# Supplementary material
Source: MDPI journal article supplement (https://www.mdpi.com/2076-3417/13/8/4990)
Supplement: s1 [file s1 › Supplementary Material.pdf]

## Supplementary Material

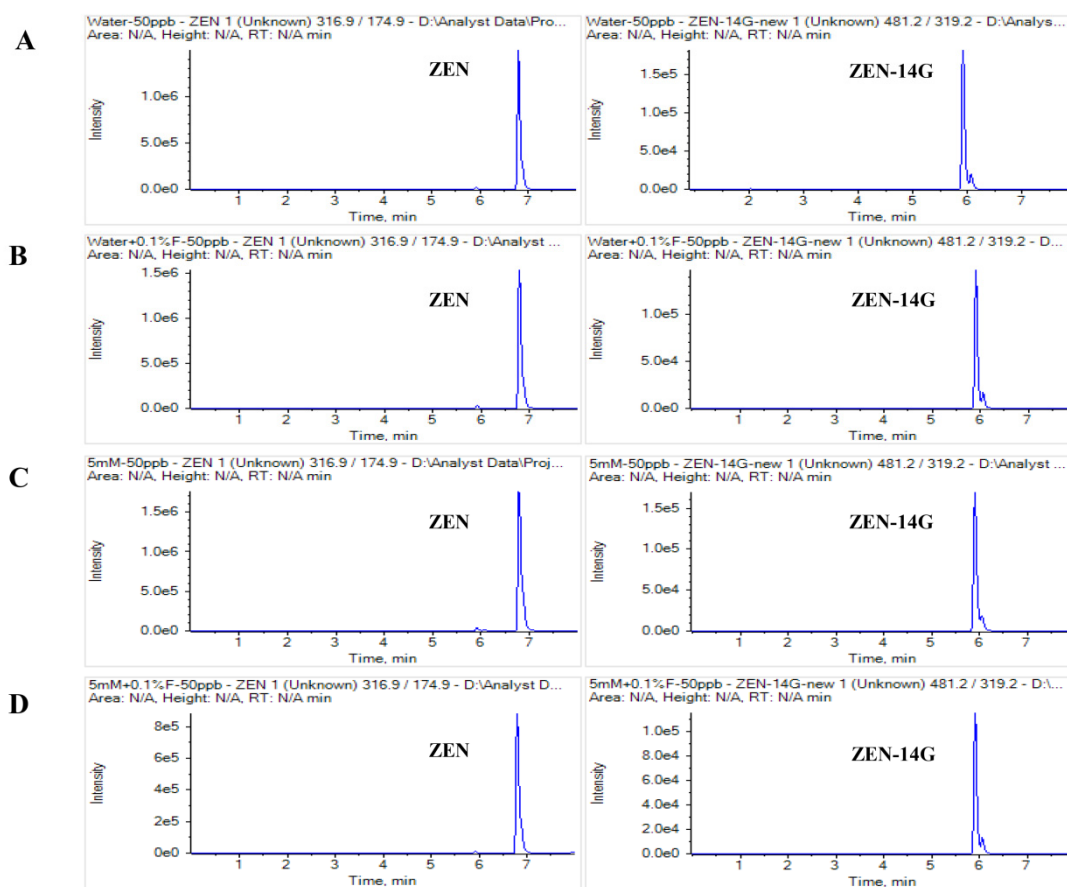

**Figure S1.** Comparison of ionization efficiencies of zearalenone (ZEN) and zearalenone-14-glucoside (ZEN-14G) among four candidate mobile phases. (A) methanol-water, (B) methanol-water containing 0.1% formic acid, (C) methanol-water containing 5 mmol/L ammonium acetate and (D) methanol-water containing 5 mmol/L ammonium acetate and 0.1% formic acid. The concentration of ZEN and ZEN-14G is 50 µg/L.

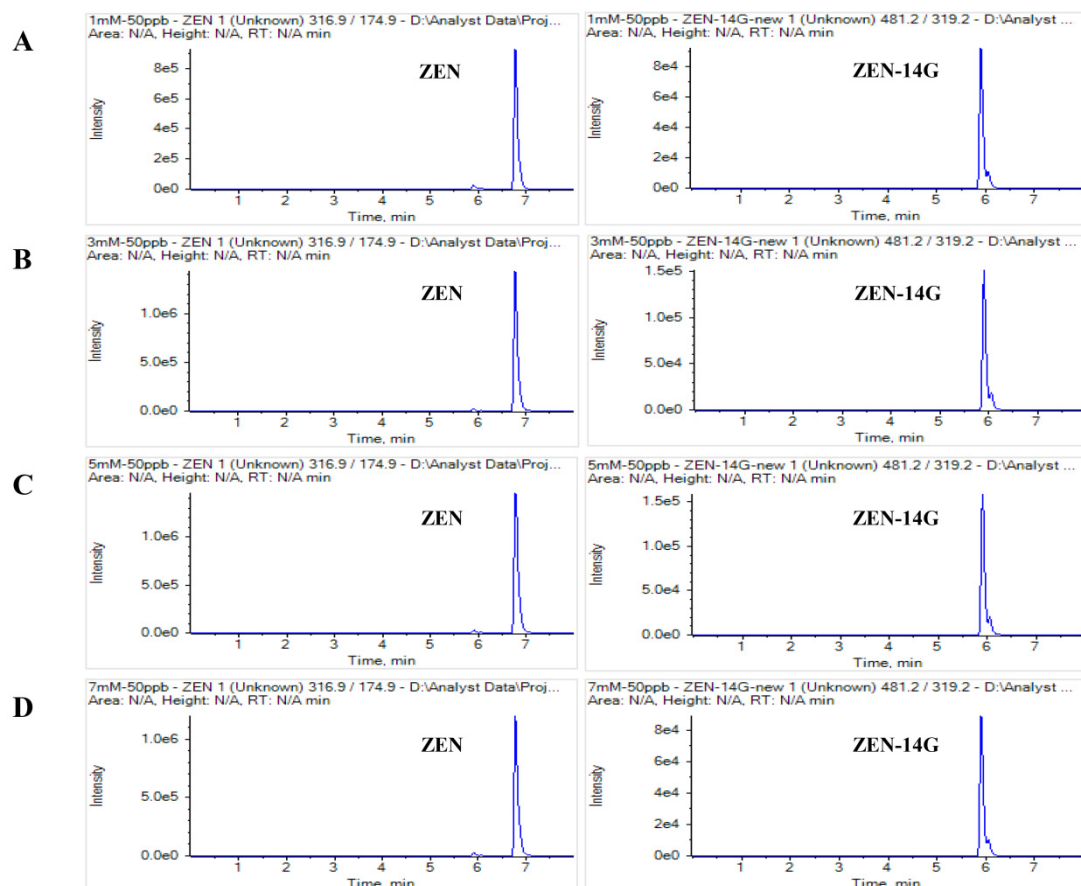

**Figure S2.** Ionization efficiencies of ZEN and ZEN-14G among different mobile phases were compared. (A) methanol-water containing 1 mmol/L ammonium acetate, (B) methanol-water containing 3 mmol/L ammonium acetate, (C) methanol-water containing 5 mmol/L ammonium acetate, and (D) methanol-water containing 7 mmol/L ammonium acetate. The concentration of ZEN and ZEN-14G is 50  $\mu$ g/L.

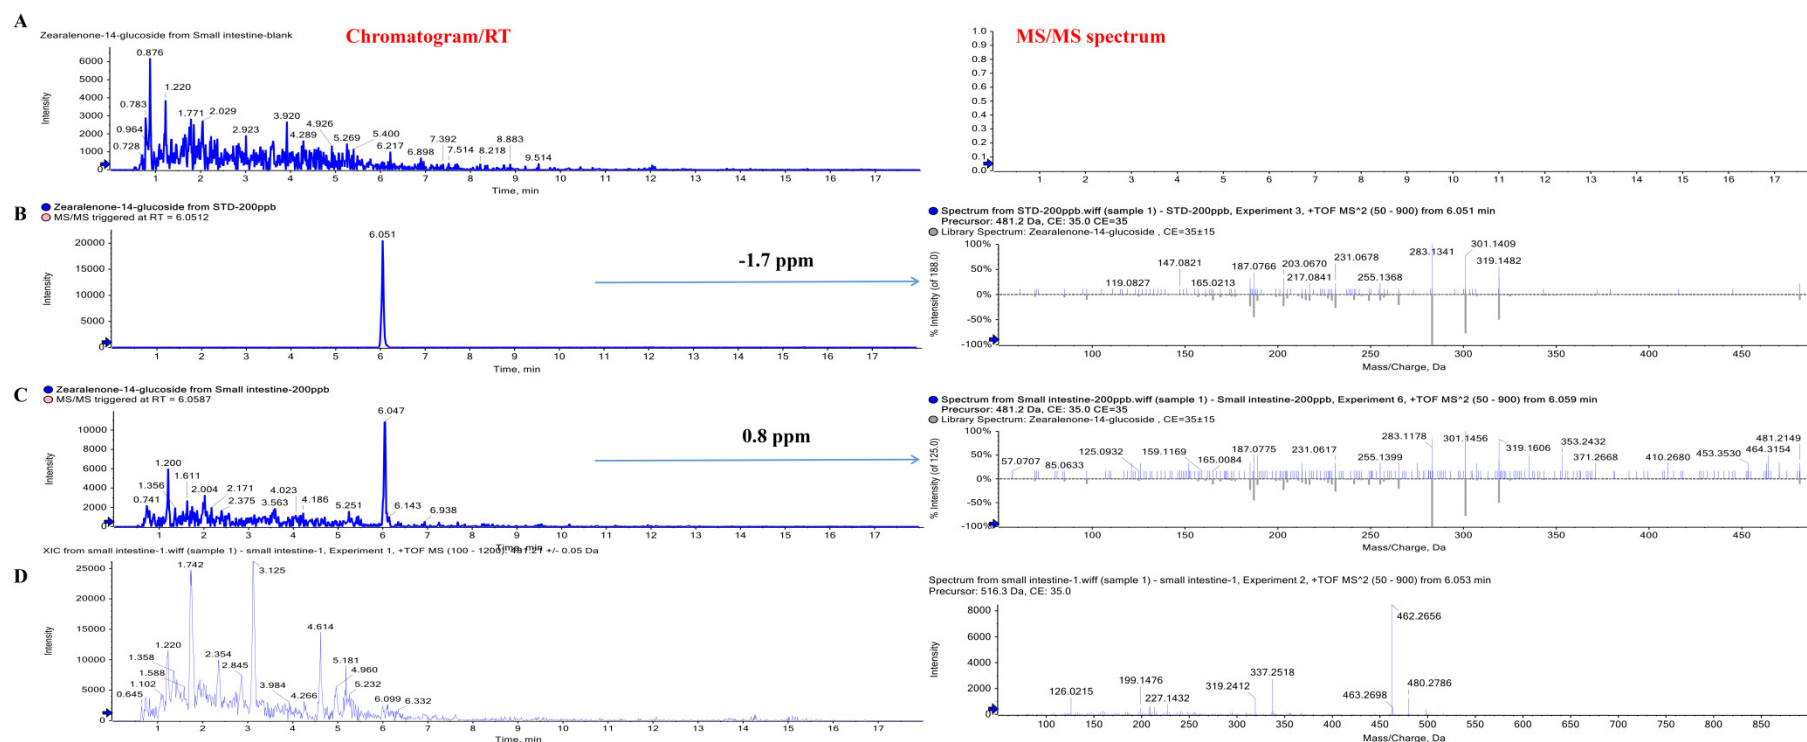

**Figure S3.** Detection and identification of ZEN-14G by the established UHPLC-Q-TOF/MS method in (A) the blank small intestine, (B) the neat solution (200  $\mu\text{g/L}$ ), (C) the spiked small intestine sample (200  $\mu\text{g/L}$ ) and (D) the small intestine samples gathered at 24 h after gavage administration of ZEN-14G (4 mg/kg body weight) in rats.



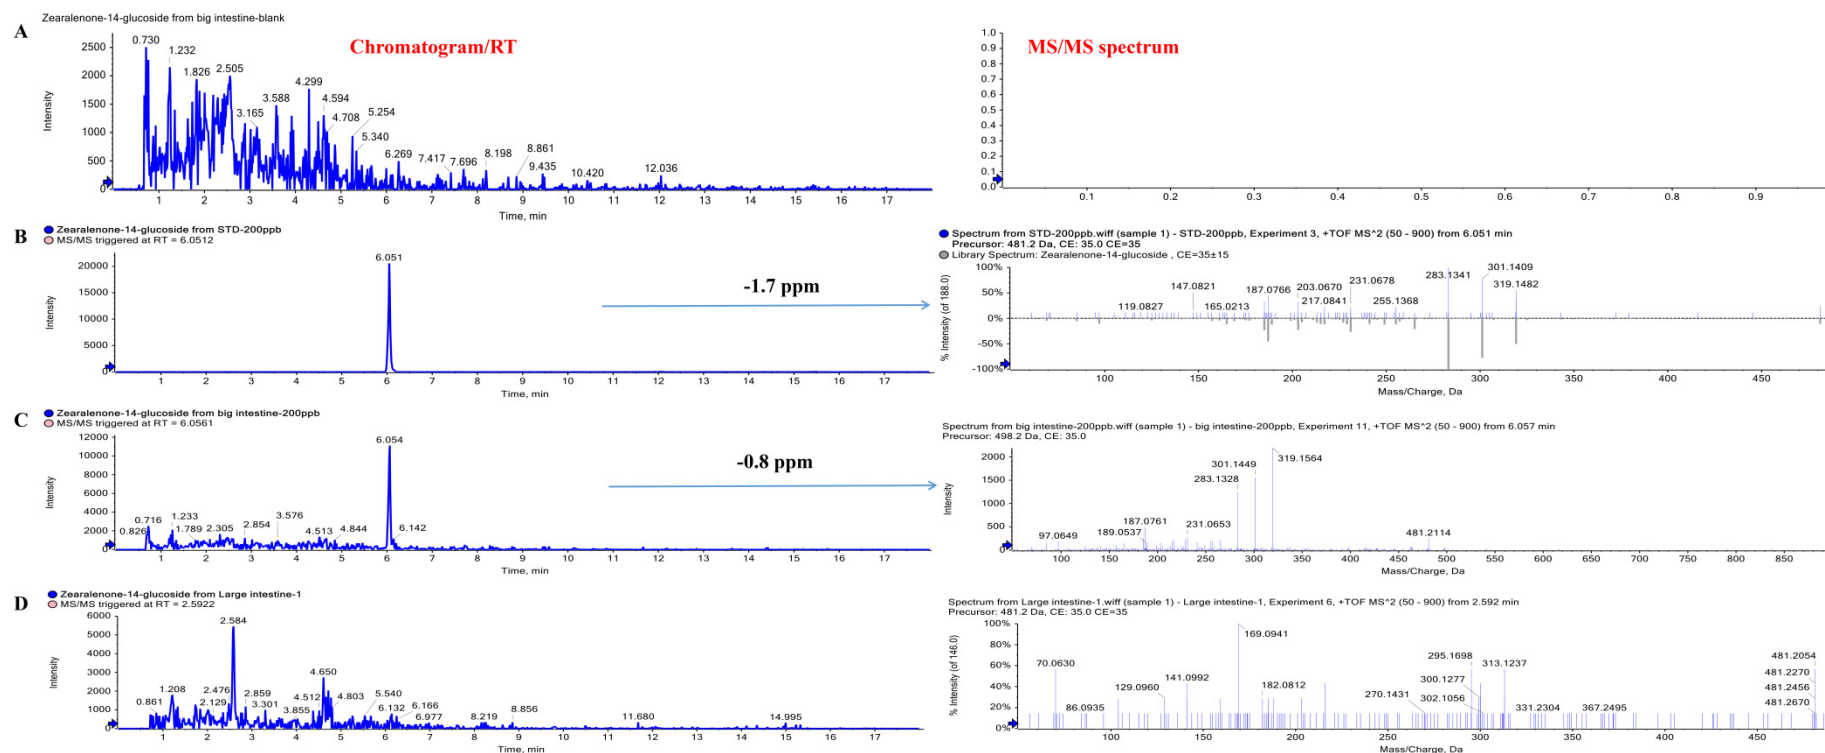

**Figure S5.** Detection and identification of ZEN-14G by the established UHPLC-Q-TOF/MS method in (A) the blank large intestine, (B) the neat solution (200  $\mu\text{g/L}$ ), (C) the spiked large intestine sample (200  $\mu\text{g/L}$ ) and (D) the large intestine samples gathered at 24 h after gavage administration of ZEN-14G (4 mg/kg body weight) in rats.

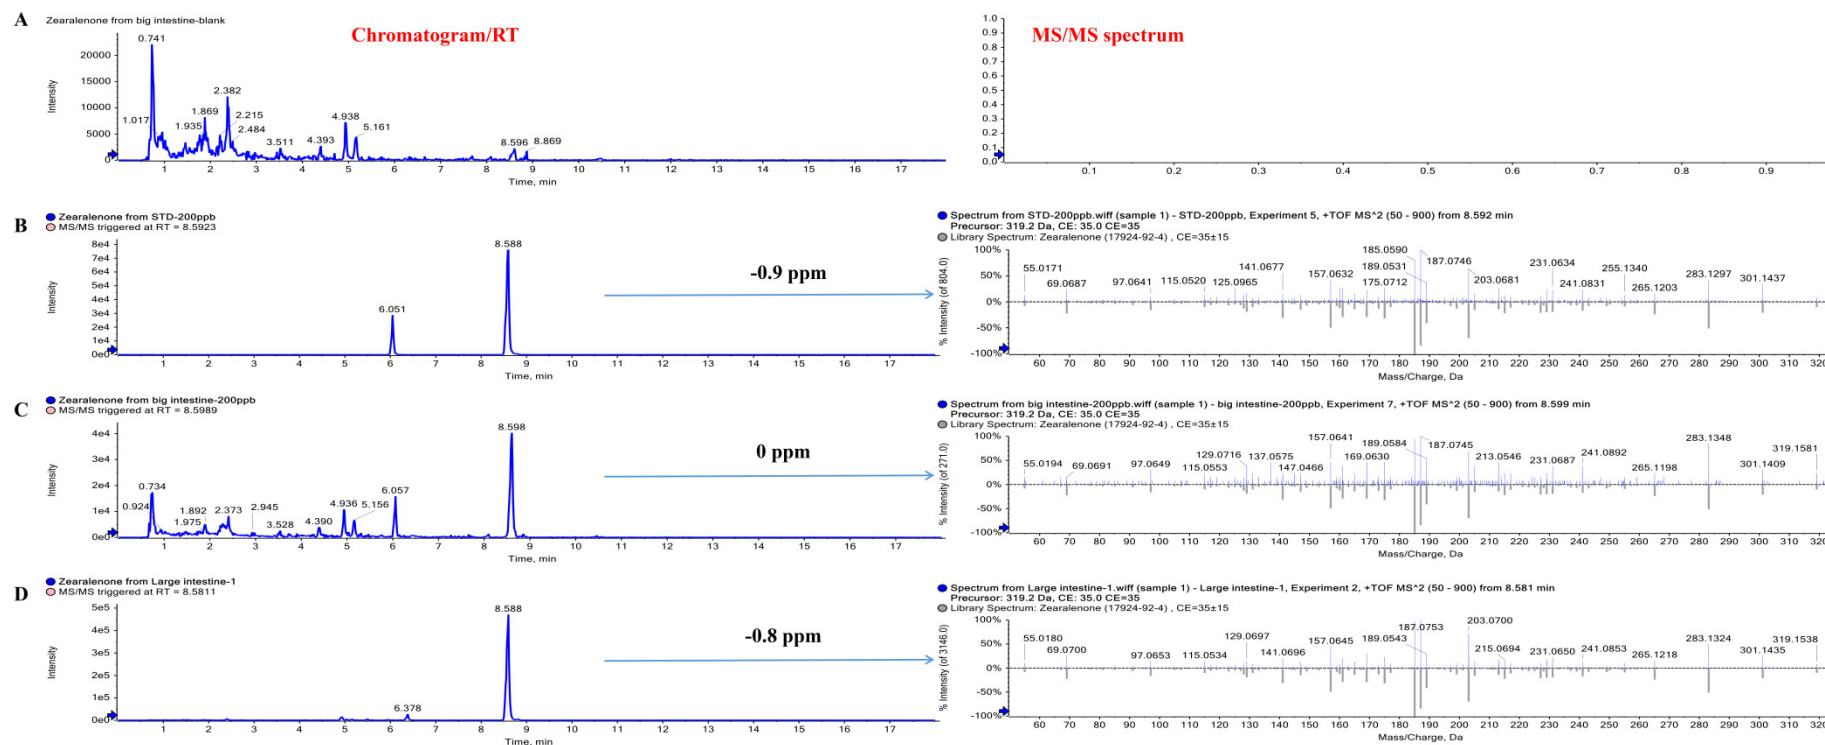

**Figure S6.** Detection and identification of ZEN by the established UHPLC-Q-TOF/MS method in (A) the blank large intestine, (B) the neat solution (200  $\mu\text{g/L}$ ), (C) the spiked large intestine sample (200  $\mu\text{g/L}$ ) and (D) the large intestine samples gathered at 24 h after gavage administration of ZEN-14G (4 mg/kg body weight) in rats.

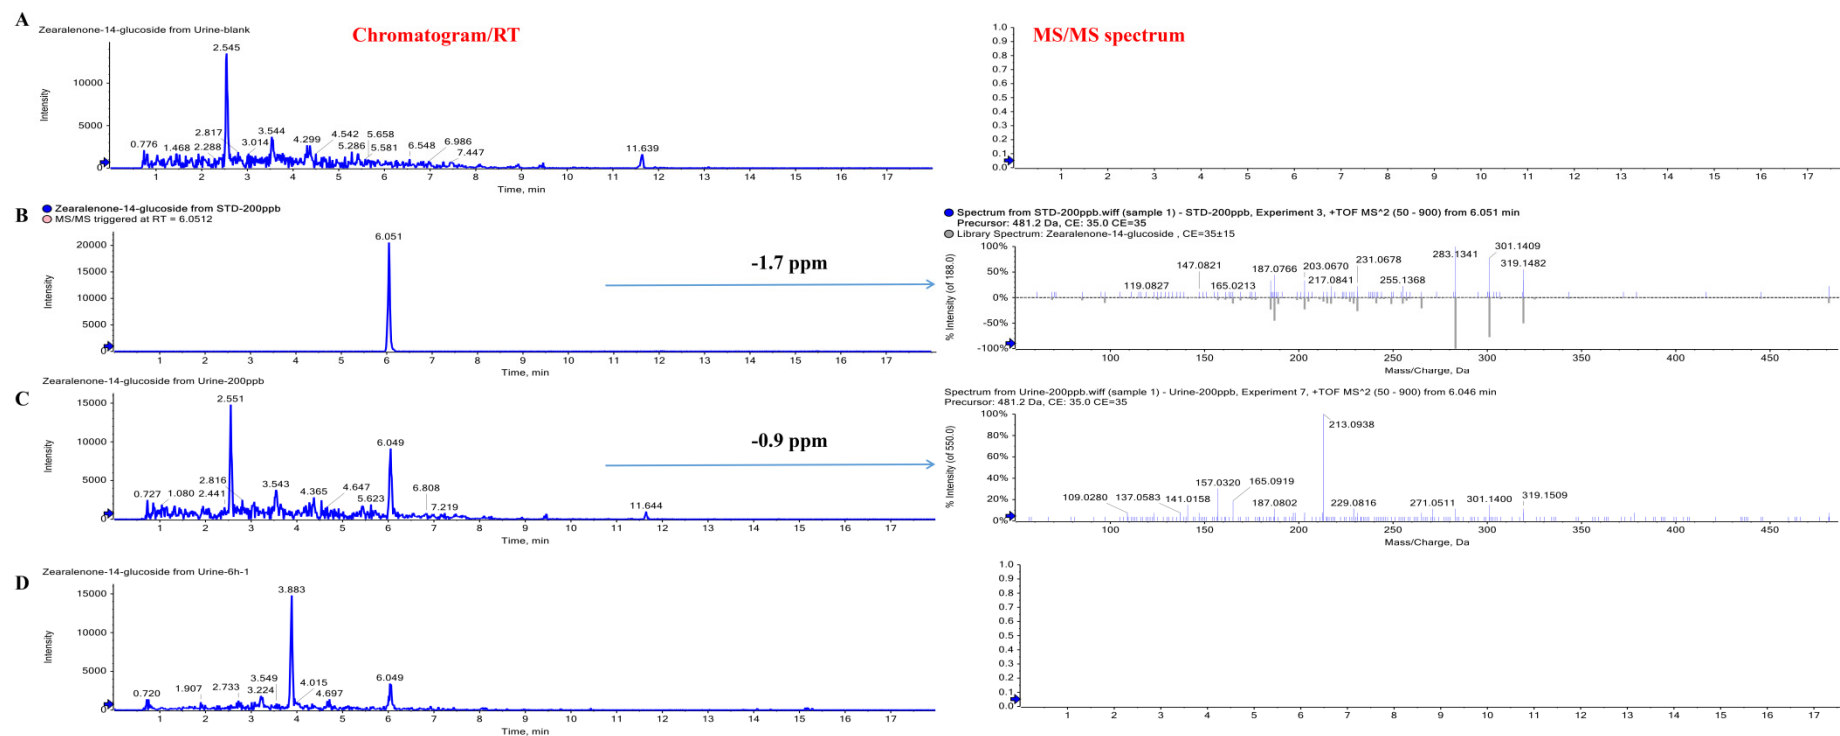

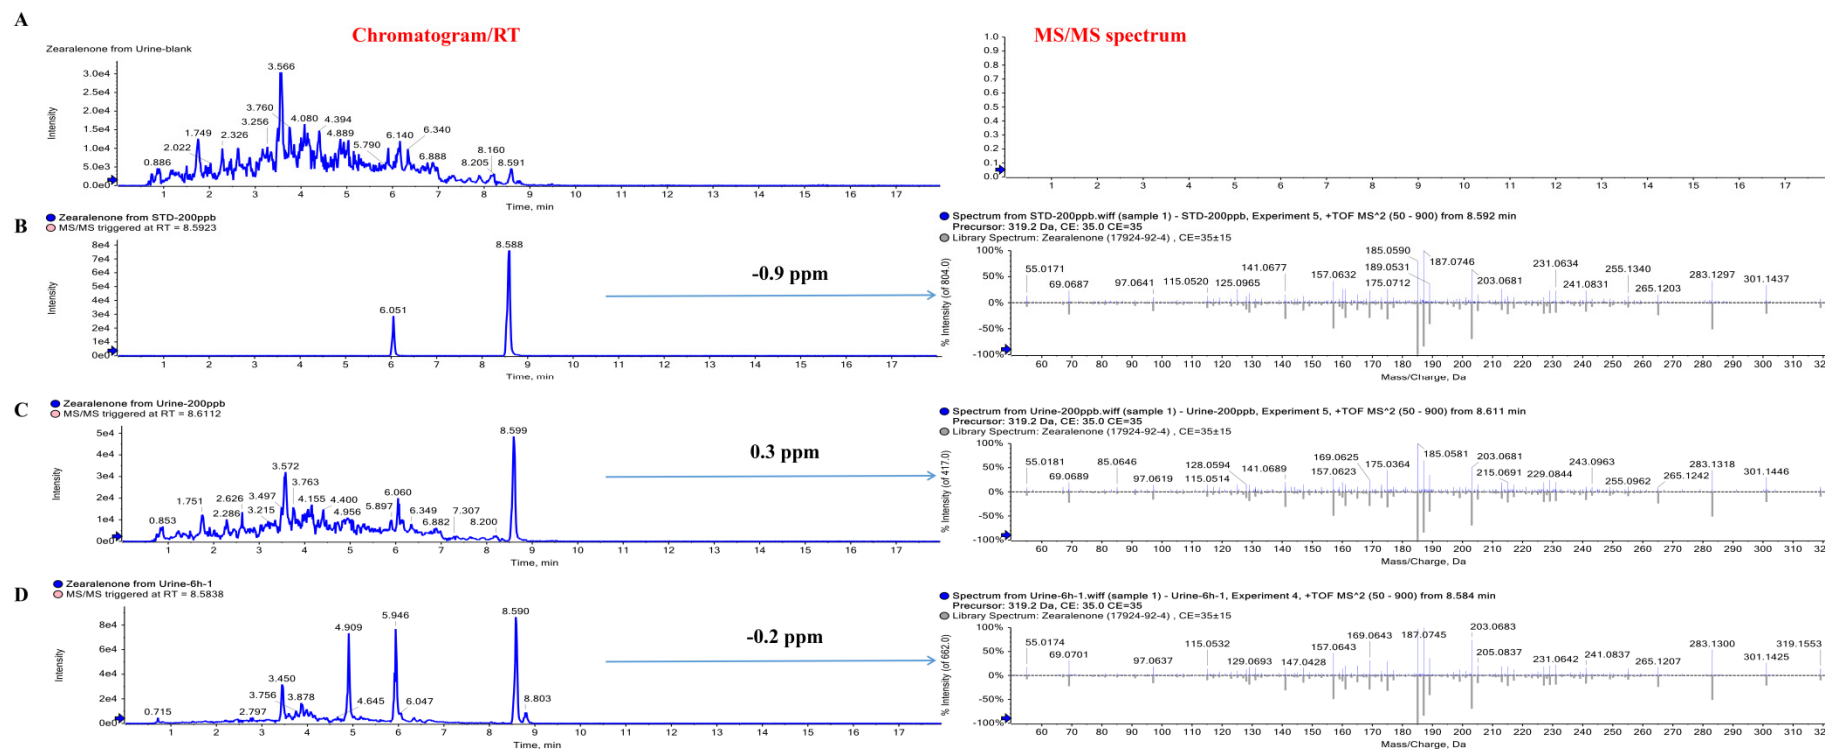

**Figure S8.** Detection and identification of ZEN by the established UHPLC-Q-TOF/MS method in (A) the blank urine, (B) the neat solution (200  $\mu\text{g/L}$ ), (C) the spiked urine sample (200  $\mu\text{g/L}$ ) and (D) the urine samples gathered at 6 h after gavage administration of ZEN-14G (4 mg/kg body weight) in rats.

**Table S1.** Comparison of the re-dissolved effects of zearalenone (ZEN) and zearalenone-14-glucoside (ZEN-14G) among different solvents.

| Solvents<br>(Acetonitrile-water containing 5 mmol/L ammonium<br>acetate, v/v) | Recovery (Mean $\pm$ SD, %) |                |
|-------------------------------------------------------------------------------|-----------------------------|----------------|
|                                                                               | ZEN                         | ZEN-14G        |
| 10/90                                                                         | 23.4 $\pm$ 2.6              | 86.8 $\pm$ 3.6 |
| 20/80                                                                         | 59.6 $\pm$ 9.4              | 93.7 $\pm$ 3.5 |
| 30/70                                                                         | 94.2 $\pm$ 3.4              | 95.9 $\pm$ 1.8 |
| 40/60                                                                         | 78.0 $\pm$ 7.6              | 87.4 $\pm$ 1.3 |
| 50/50                                                                         | 79.7 $\pm$ 5.8              | 93.7 $\pm$ 2.1 |

**Table S2.** Stability of zearalenone (ZEN) and zearalenone-14-glucoside (ZEN-14G)  
(n = 5).

| Matrix  | Mycotoxin | Spiked Level<br>(µg/L) | Recovery (Mean ± SD, %) |                        |                          |
|---------|-----------|------------------------|-------------------------|------------------------|--------------------------|
|         |           |                        | Short-Term <sup>a</sup> | Long-Term <sup>b</sup> | Freeze-Thaw <sup>c</sup> |
| Plasma  | ZEN       | LLOQ                   | 89.9 ± 4.6              | 90.9 ± 7.2             | 91.8 ± 4.6               |
|         |           | 5                      | 94.0 ± 1.8              | 88.3 ± 7.1             | 87.1 ± 9.3               |
|         |           | 20                     | 92.7 ± 4.4              | 89.4 ± 8.1             | 87.3 ± 6.8               |
|         |           | 50                     | 94.0 ± 3.8              | 94.0 ± 3.8             | 96.5 ± 6.5               |
|         | ZEN-14G   | LLOQ                   | 104.1 ± 3.9             | 102.4 ± 5.4            | 101.8 ± 5.5              |
|         |           | 5                      | 99.7 ± 5.9              | 93.7 ± 3.7             | 93.6 ± 4.0               |
|         |           | 20                     | 94.6 ± 1.6              | 95.7 ± 6.8             | 95.7 ± 4.0               |
|         |           | 50                     | 92.7 ± 2.3              | 92.5 ± 6.5             | 91.6 ± 6.1               |
| Liver   | ZEN       | LLOQ                   | 90.5 ± 8.6              | 88.4 ± 8.4             | 89.0 ± 6.2               |
|         |           | 5                      | 95.5 ± 7.4              | 98.5 ± 6.5             | 98.2 ± 3.4               |
|         |           | 20                     | 98.9 ± 7.8              | 100.0 ± 8.9            | 93.2 ± 2.5               |
|         |           | 50                     | 99.7 ± 2.7              | 101.0 ± 2.3            | 98.2 ± 7.1               |
|         | ZEN-14G   | LLOQ                   | 94.9 ± 5.4              | 93.6 ± 7.1             | 97.0 ± 5.6               |
|         |           | 5                      | 96.7 ± 0.3              | 95.6 ± 8.9             | 95.7 ± 6.8               |
|         |           | 20                     | 94.9 ± 7.0              | 94.2 ± 7.8             | 98.9 ± 5.2               |
|         |           | 50                     | 100.5 ± 4.4             | 100.4 ± 3.7            | 97.4 ± 3.4               |
| Kidney  | ZEN       | LLOQ                   | 86.6 ± 10.8             | 84.8 ± 10.6            | 86.6 ± 10.7              |
|         |           | 5                      | 91.3 ± 4.0              | 94.6 ± 4.2             | 98.4 ± 1.2               |
|         |           | 20                     | 94.1 ± 5.5              | 96.9 ± 5.8             | 91.1 ± 5.2               |
|         |           | 50                     | 102.8 ± 5.7             | 102.2 ± 2.3            | 100.9 ± 5.0              |
|         | ZEN-14G   | LLOQ                   | 88.1 ± 3.1              | 86.4 ± 3.0             | 89.4 ± 3.1               |
|         |           | 5                      | 96.3 ± 7.1              | 99.0 ± 7.6             | 99.4 ± 3.7               |
|         |           | 20                     | 96.6 ± 7.6              | 96.6 ± 9.3             | 95.5 ± 6.3               |
|         |           | 50                     | 99.2 ± 1.5              | 101.5 ± 3.6            | 98.2 ± 1.2               |
| Stomach | ZEN       | LLOQ                   | 89.0 ± 8.1              | 85.9 ± 5.0             | 90.1 ± 8.2               |

|                 |         |      |                 |                 |                 |
|-----------------|---------|------|-----------------|-----------------|-----------------|
| Small intestine |         | 5    | $93.7 \pm 6.0$  | $90.6 \pm 6.9$  | $93.3 \pm 8.2$  |
|                 |         | 20   | $100.2 \pm 4.6$ | $102.0 \pm 6.9$ | $98.5 \pm 6.1$  |
|                 |         | 50   | $94.1 \pm 5.8$  | $95.4 \pm 5.2$  | $96.6 \pm 3.3$  |
|                 |         | LLOQ | $86.2 \pm 1.8$  | $81.7 \pm 1.7$  | $87.9 \pm 8.1$  |
|                 | ZEN-14G | 5    | $93.5 \pm 1.8$  | $98.4 \pm 5.9$  | $99.0 \pm 4.3$  |
|                 |         | 20   | $95.3 \pm 4.8$  | $104.1 \pm 4.9$ | $98.8 \pm 6.2$  |
|                 |         | 50   | $94.9 \pm 4.0$  | $97.5 \pm 7.4$  | $97.5 \pm 5.2$  |
|                 | ZEN     | LLOQ | $88.7 \pm 6.6$  | $85.0 \pm 6.4$  | $85.9 \pm 7.5$  |
|                 |         | 5    | $96.3 \pm 4.4$  | $93.6 \pm 2.2$  | $99.7 \pm 3.3$  |
|                 |         | 20   | $99.6 \pm 2.1$  | $101.0 \pm 7.4$ | $97.9 \pm 5.3$  |
|                 |         | 50   | $98.0 \pm 3.4$  | $98.9 \pm 6.8$  | $98.8 \pm 6.1$  |
| Large intestine | ZEN-14G | LLOQ | $87.2 \pm 6.9$  | $86.3 \pm 6.3$  | $87.9 \pm 6.0$  |
|                 |         | 5    | $95.1 \pm 6.8$  | $98.2 \pm 5.8$  | $96.8 \pm 6.9$  |
|                 |         | 20   | $97.6 \pm 5.5$  | $100.0 \pm 1.5$ | $96.9 \pm 2.0$  |
|                 |         | 50   | $94.8 \pm 5.5$  | $95.1 \pm 5.5$  | $94.1 \pm 4.8$  |
|                 | ZEN     | LLOQ | $91.8 \pm 4.2$  | $85.5 \pm 3.0$  | $86.5 \pm 4.5$  |
|                 |         | 5    | $93.0 \pm 5.2$  | $90.4 \pm 5.0$  | $90.5 \pm 3.8$  |
|                 |         | 20   | $95.0 \pm 8.6$  | $101.3 \pm 4.4$ | $100.4 \pm 2.7$ |
|                 |         | 50   | $95.6 \pm 3.8$  | $97.6 \pm 8.1$  | $95.8 \pm 3.1$  |
| Ovary           | ZEN-14G | LLOQ | $92.3 \pm 1.1$  | $86.0 \pm 1.0$  | $82.5 \pm 1.0$  |
|                 |         | 5    | $97.3 \pm 2.9$  | $99.6 \pm 4.0$  | $95.0 \pm 3.9$  |
|                 |         | 20   | $96.8 \pm 1.9$  | $100.0 \pm 7.5$ | $98.9 \pm 5.2$  |
|                 |         | 50   | $95.0 \pm 8.4$  | $96.1 \pm 4.1$  | $96.9 \pm 4.0$  |
|                 | ZEN     | LLOQ | $89.8 \pm 5.6$  | $91.3 \pm 5.2$  | $90.9 \pm 5.2$  |
|                 |         | 5    | $96.9 \pm 5.6$  | $95.2 \pm 4.4$  | $90.0 \pm 9.3$  |
|                 |         | 20   | $96.3 \pm 2.1$  | $97.7 \pm 1.7$  | $95.6 \pm 9.5$  |
|                 |         | 50   | $100.5 \pm 3.2$ | $102.3 \pm 3.9$ | $97.6 \pm 6.2$  |
|                 | ZEN-14G | LLOQ | $90.3 \pm 6.8$  | $86.1 \pm 5.0$  | $96.7 \pm 7.3$  |
|                 |         | 5    | $96.7 \pm 3.8$  | $98.1 \pm 5.8$  | $94.3 \pm 2.5$  |

|       |     |      |             |             |             |
|-------|-----|------|-------------|-------------|-------------|
| Urine | ZEN | 20   | 98.6 ± 6.9  | 101.7 ± 3.3 | 100.3 ± 5.1 |
|       |     | 50   | 98.5 ± 4.0  | 99.4 ± 2.4  | 101.3 ± 3.5 |
|       |     | LLOQ | 85.1 ± 6.0  | 89.6 ± 8.9  | 85.2 ± 6.9  |
|       |     | 5    | 91.9 ± 10.2 | 89.6 ± 7.4  | 90.6 ± 5.3  |
|       |     | 20   | 92.7 ± 4.8  | 98.9 ± 4.8  | 96.5 ± 9.7  |
|       |     | 50   | 98.5 ± 3.4  | 101.2 ± 4.4 | 97.1 ± 2.4  |
|       |     | LLOQ | 90.5 ± 7.9  | 89.4 ± 7.8  | 88.3 ± 7.7  |
|       |     | 5    | 94.9 ± 4.9  | 97.7 ± 3.9  | 96.9 ± 4.8  |
|       |     | 20   | 100.2 ± 5.4 | 101.2 ± 5.8 | 98.5 ± 1.9  |
|       |     | 50   | 96.3 ± 5.1  | 96.0 ± 6.2  | 96.6 ± 4.5  |

“a”: stored at room temperature for 8 h; “b”: stored at −20 °C for 20 days; “c”: undergo three freeze-thaw cycles.

**Table S3.** The screening detection limits (SDLs) obtained by UHPLC-Q-TOF/MS for the investigated zearalenone (ZEN) and zearalenone-14-glucoside (ZEN-14G) in different matrix.

| Matrix          | Mycotoxin | SDL (µg/L) |
|-----------------|-----------|------------|
| Solvent         | ZEN       | /          |
|                 | ZEN-14G   | /          |
| Plasma          | ZEN       | 50         |
|                 | ZEN-14G   | 200        |
| Liver           | ZEN       | 50         |
|                 | ZEN-14G   | 200        |
| Kidney          | ZEN       | 100        |
|                 | ZEN-14G   | 200        |
| Stomach         | ZEN       | 200        |
|                 | ZEN-14G   | 200        |
| Small intestine | ZEN       | 200        |
|                 | ZEN-14G   | 200        |
| Large intestine | ZEN       | 50         |
|                 | ZEN-14G   | 100        |
| Ovary           | ZEN       | 100        |
|                 | ZEN-14G   | 100        |
| Urine           | ZEN       | 200        |
|                 | ZEN-14G   | 200        |

**Table S4.** In-parallel analysis of the concentration of zearalenone (ZEN) and zearalenone-14-glucoside (ZEN-14G) in plasma (10 min), liver (24 h), and urine (24 h) samples after gavage administration of ZEN-14G (dose of 4 mg/kg body weight, n = 3) to rats by the current established method and previously reported LC-MS/MS method (Mean  $\pm$  SD,  $\mu\text{g/L}$ ).

| Mycotoxin | Plasma        | Liver          | Urine            | Methods  | References                     |
|-----------|---------------|----------------|------------------|----------|--------------------------------|
| ZEN       | 3.1 $\pm$ 0.3 | -              | -                | LC-MS/MS | [1]                            |
| ZEN-14G   | 4.8 $\pm$ 0.8 | -              | -                |          |                                |
| ZEN       | -             | 94.7 $\pm$ 0.8 | -                | LC-MS/MS | [2]                            |
| ZEN-14G   | -             | /              | -                |          |                                |
| ZEN       | -             | -              | 918.2 $\pm$ 29.3 | LC-MS/MS | [3]                            |
| ZEN-14G   | -             | -              | 8.2 $\pm$ 2.4    |          |                                |
| ZEN       | 2.8 $\pm$ 0.2 | 97.1 $\pm$ 7.6 | 977.5 $\pm$ 98.0 | LC-MS/MS | The current established method |
| ZEN-14G   | 4.4 $\pm$ 1.2 | /              | 7.6 $\pm$ 3.0    |          |                                |

"/": low than the lower limit of quantification; "-": no detection.

**Table S5.** Comparison of solubility of zearalenone-14-glucoside (ZEN-14G) with the concentration of 100 µg/L in different solvents for gavage administration.

| Solvents             | Solubility (Mean ± SD, µg/L) |
|----------------------|------------------------------|
| (Ethanol/Water, V/V) | ZEN-14G                      |
| 10/90                | 82.5 ± 2.1                   |
| 20/80                | 81.9 ± 5.4                   |
| 25/75                | 99.8 ± 1.8                   |
| 30/70                | 99.9 ± 2.6                   |
| 40/60                | 99.7 ± 0.9                   |

#### References

1. Dellafiora, L.; Galaverna, G.; Righi, F.; Cozzini, P.; Dall'Asta, C. Assessing the hydrolytic fate of the masked mycotoxin zearalenone-14-glucoside - a warning light for the need to look at the "maskedome". *Food Chem. Toxicol.* 2017, 9, 9-16. <https://doi.org/10.1016/j.fct.2016.11.013>.
2. Ver?ilovskis, A.; Geys, J.; Huybrechts, B.; Goossens, E.; De, Saeger, S.; Callebaut, A. Simultaneous determination of masked forms of deoxynivalenol and zearalenone after oral dosing in rats by LC-MS/MS. *World Mycotoxin J.* 2012, 5, 303-318. <https://doi.org/10.3920/WMJ2012.1411>.
3. Warth, B.; Petchkongkaew, A.; Sulyok, M.; Krska, R. Utilising an LC-MS/MS-based multi-biomarker approach to assess mycotoxin exposure in the Bangkok metropolitan area and surrounding provinces. *Food Addit. Contam. Part A Chem. Anal. Control. Expo. Risk. Assess.* 2014, 31, 040-6. <https://doi.org/10.1080/19440049.2014.969329>.
